# Supplementary material for: Microbiome-mediated neutrophil recruitment via CXCR2 and protection from amebic colitis
Source: PubMed Central journal article supplement (PMC5560520; doi:10.1371/journal.ppat.1006513), 2017-08-17
Supplement: ppat.1006513.s001.pdf [file ppat.1006513.s001.pdf]

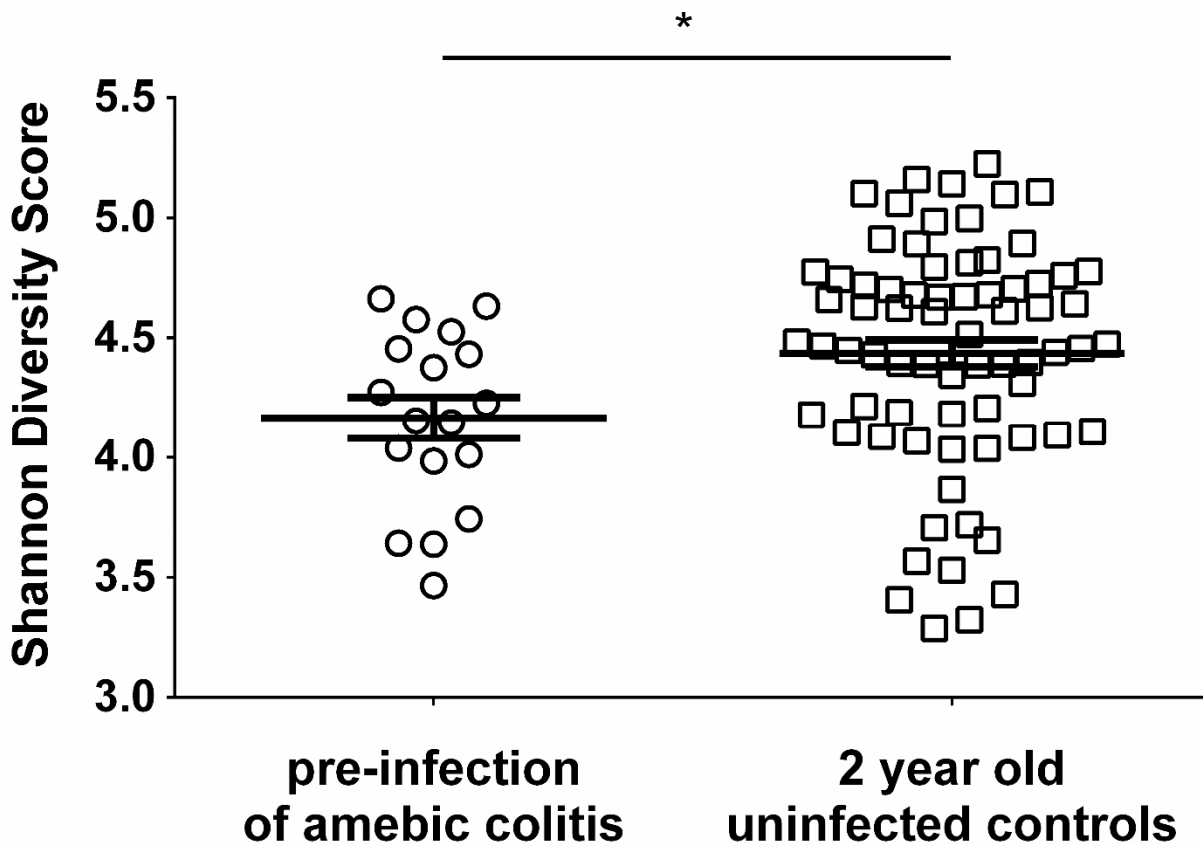

**S1 Fig. Diversity of microbiome was decreased prior to amebic colitis.** The Shannon diversity index was examined using stool samples collected from children followed longitudinally in an urban slum in Dhaka, Bangladesh who developed amebic colitis within the first 2 years of life (n=18). The Shannon diversity index was measured one month prior to amebic colitis, and compared to that from children who did not develop *E. histolytica* infection (n=72). \* $P < 0.05$ , by Welch's unequal variance t-test. Error bars represent standard error of the mean (s.e.m).
