# Supplementary material for: Microbiome-mediated neutrophil recruitment via CXCR2 and protection from amebic colitis
Source: PubMed Central journal article supplement (PMC5560520; doi:10.1371/journal.ppat.1006513), 2017-08-17
Supplement: ppat.1006513.s002.pdf [file ppat.1006513.s002.pdf]

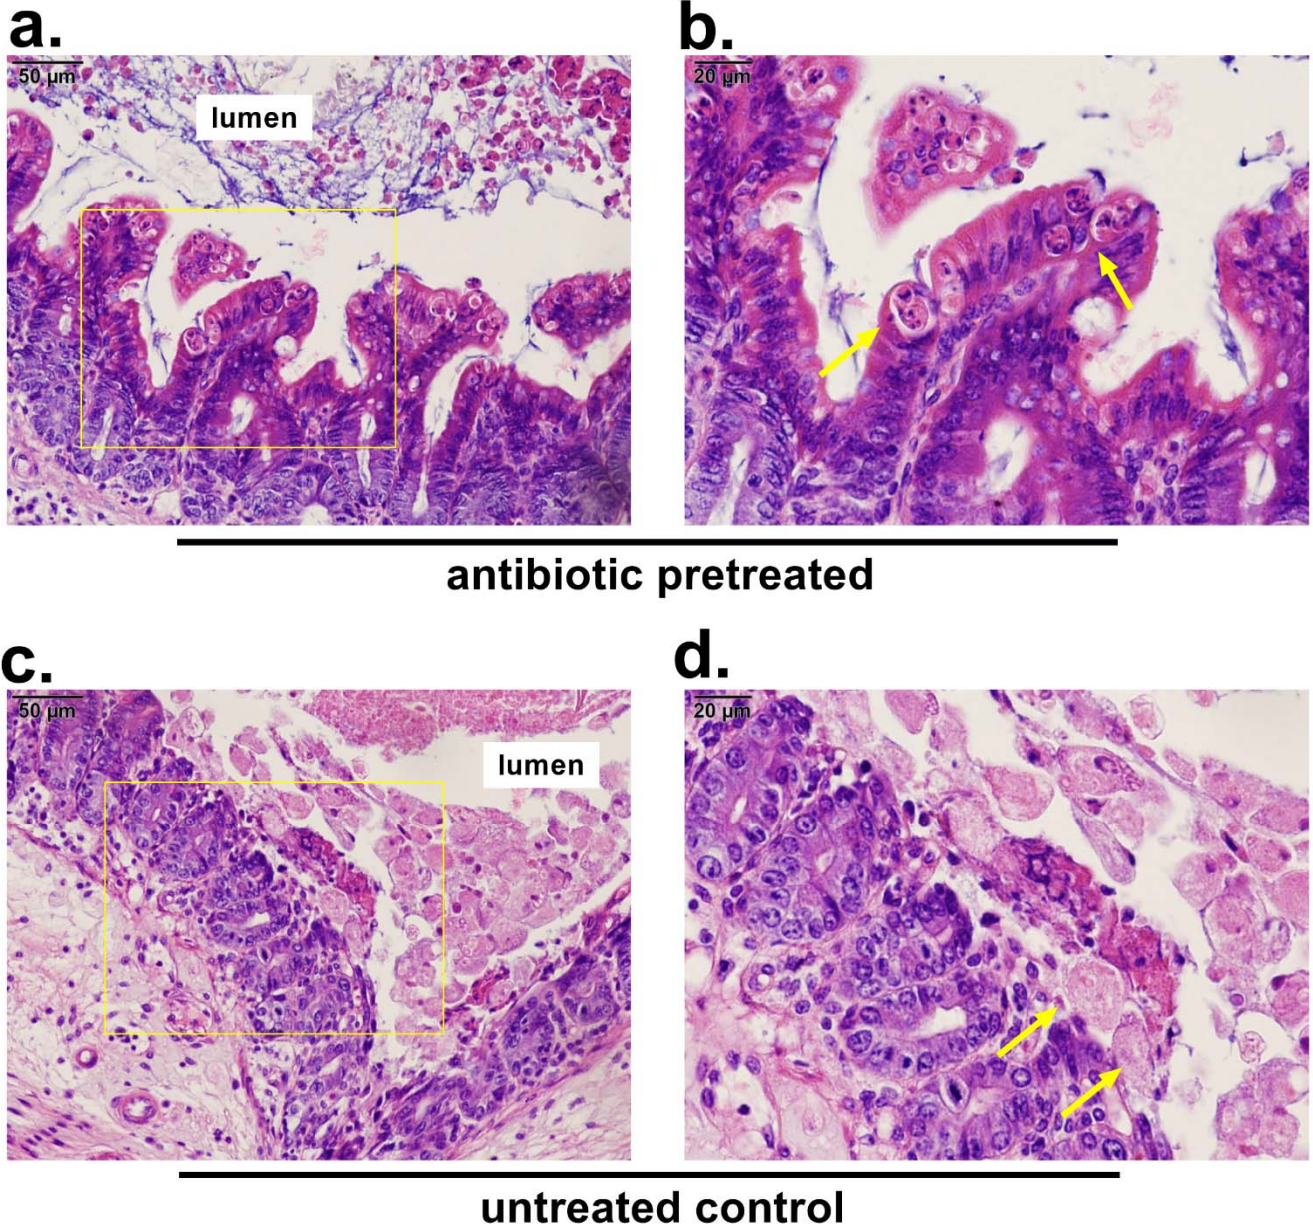

**S2 Fig. Tissue invasion into intestinal epithelial cells by *E. histolytica* in antibiotic pre-treated mice but not in untreated control mice.** Histopathological examinations by hematoxylin and eosin stain were performed using cecal tissue collected from mice sacrificed at 24 hours after *E. histolytica* challenge. Yellow arrows represent *E. histolytica*. **(a, b)** Representative pictures of tissue invasion by *E. histolytica* in antibiotic pretreated mice. **(c, d)** Representative pictures of ulcerative lesions in untreated control mice. **(a, c)** x200 represents yellow boxes in a and d, **(b, d)** x400 represents yellow boxes in a and c.
