# Supplementary material for: Microbiome-mediated neutrophil recruitment via CXCR2 and protection from amebic colitis
Source: PubMed Central journal article supplement (PMC5560520; doi:10.1371/journal.ppat.1006513), 2017-08-17
Supplement: ppat.1006513.s003.pdf [file ppat.1006513.s003.pdf]

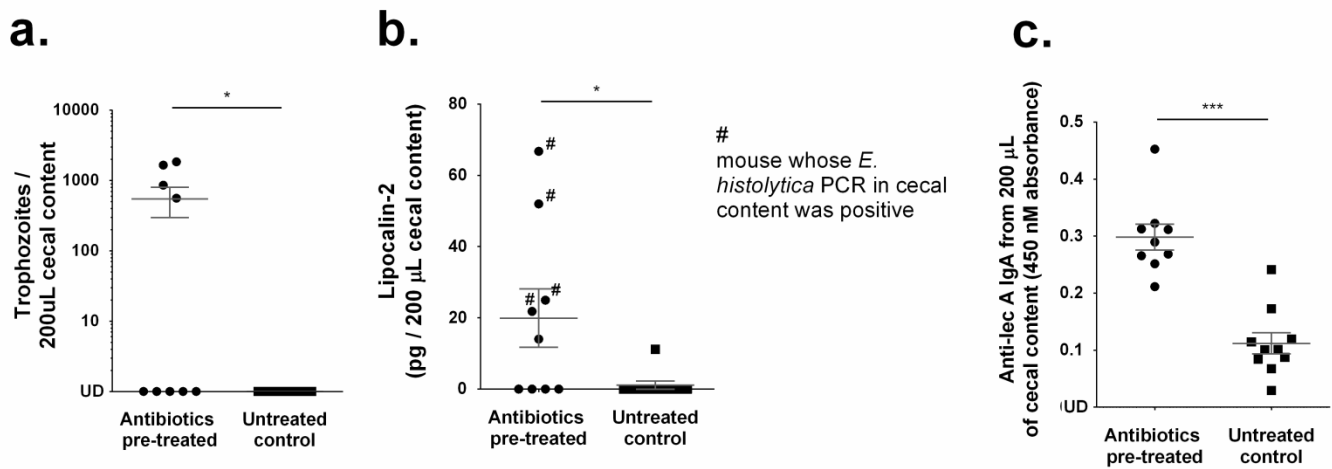

**S3 Fig. Immune responses at day 9 are correlated with Infection outcome of *E. histolytica*.** Antibiotic pre-treated or untreated control wild type C57BL/6 mice were infected with  $2 \times 10^6$  *E. histolytica* trophozoites intracecally, and were sacrificed at day 9. **(a)** *E. histolytica* burden was measured by qPCR. **(b, c)** lipocalin-2 and anti-lectin IgA were assessed by ELISA using 200 µL of cecal contents. Data are representative from similarly conducted two independent experiments. \* $P < 0.05$ , \*\* $P < 0.01$ , \*\*\* $P < 0.001$  by Welch's unequal variance. NS, not significant. Error bars represent s.e.m.
