# Supplementary material for: Microbiome-mediated neutrophil recruitment via CXCR2 and protection from amebic colitis
Source: PubMed Central journal article supplement (PMC5560520; doi:10.1371/journal.ppat.1006513), 2017-08-17
Supplement: ppat.1006513.s004.pdf [file ppat.1006513.s004.pdf]

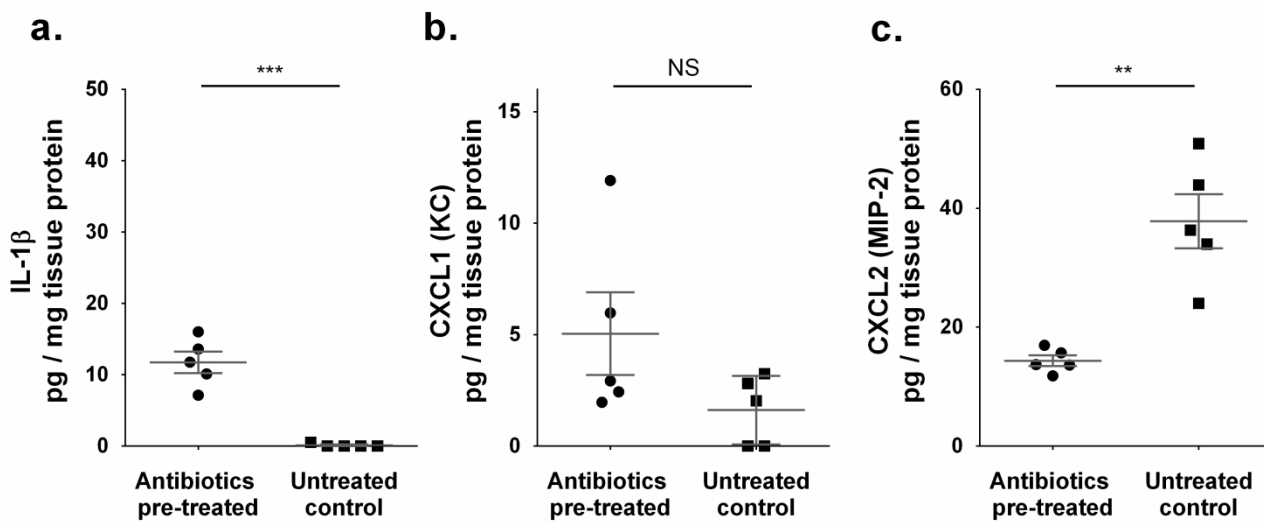

**S4 Fig. IL-1 $\beta$  and neutrophil attractant chemokines at baseline.**

Antibiotic pre-treated or untreated control wild type C57BL/6 mice were sacrificed at 2 weeks of antibiotics in order to see the baseline data of IL-1 $\beta$ , CXCL1 and CXCL2 in cecal tissue before *E. histolytica* challenge. Cecal cytokines were assessed by lysing 50mg of cecal sections and quantifying protein via ELISA, and shown normalized to total protein concentration (data from single experiment, n=5 per group). \* $P < 0.05$ , \*\* $P < 0.01$ , \*\*\* $P < 0.001$  by Welch's unequal variance. NS, not significant. Error bars represent s.e.m.
