# Supplementary material for: Microbiome-mediated neutrophil recruitment via CXCR2 and protection from amebic colitis
Source: PubMed Central journal article supplement (PMC5560520; doi:10.1371/journal.ppat.1006513), 2017-08-17
Supplement: ppat.1006513.s005.pdf [file ppat.1006513.s005.pdf]

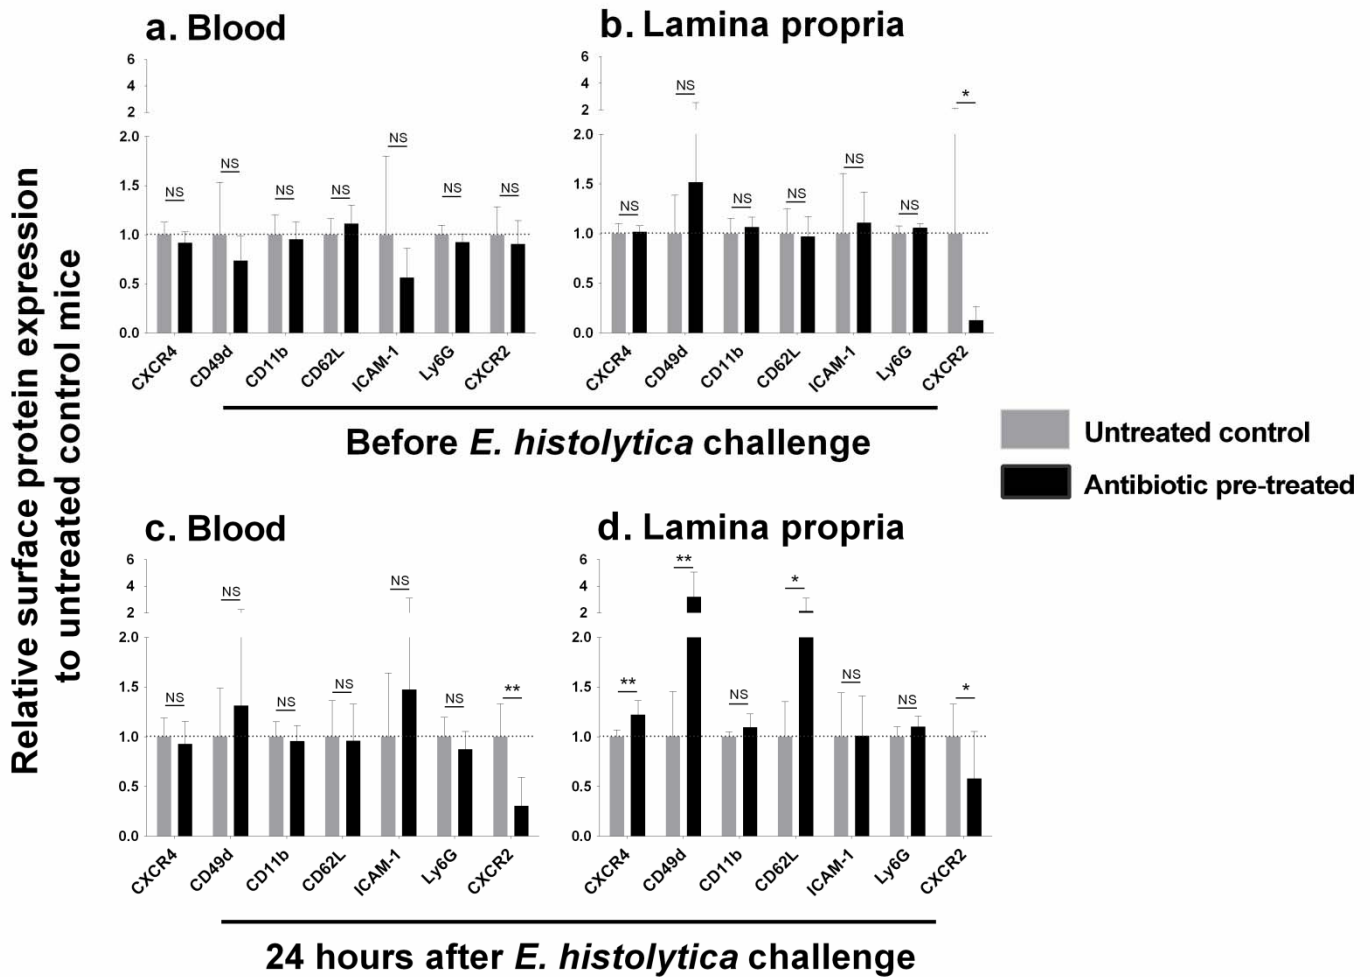

**S5 Fig. Surface expression of molecules on neutrophils.** Antibiotic pre-treated or untreated control wild type C57BL/6 mice were infected with  $2 \times 10^6$  *E. histolytica* trophozoites intracecally. Surface protein expression levels were assessed as mean fluorescence intensity (MFI) by flow cytometry using single cell suspension from blood and lamina propria. **(a, b)** Surface protein expression levels before *E. histolytica* challenge. **(c, d)** Surface protein expression levels at 24 hours after *E. histolytica* challenge. Data are from a single experiment, n=8 per group. \* $P < 0.05$ , \*\* $P < 0.01$ , \*\*\* $P < 0.001$  by Welch's unequal variance t-test NS, not significant. Error bars represent s.e.m.
