# Supplementary material for: Microbiome-mediated neutrophil recruitment via CXCR2 and protection from amebic colitis
Source: PubMed Central journal article supplement (PMC5560520; doi:10.1371/journal.ppat.1006513), 2017-08-17
Supplement: ppat.1006513.s006.pdf [file ppat.1006513.s006.pdf]

## S1 Table. Clinical Scoring

|                    | 0              | 1                                 | 2                       | 3                       | 4                 |
|--------------------|----------------|-----------------------------------|-------------------------|-------------------------|-------------------|
| <b>Weight loss</b> | No weight loss | < 10% Weight loss                 | 10–15% weight loss      | 15–20% Weight loss      | > 20% Weight loss |
| <b>Coat</b>        | Normal         | Slightly ruffled                  | Rough/Hair loss         | Very ruffled/puff       |                   |
| <b>Eyes/Nose</b>   | Normal         | Squinted 1/2 closed               | Squinted/discharge      | Closed/discharge        |                   |
| <b>Activity</b>    | Normal         | Alert/slow moving                 | Lethargic/shaky         | Inactive/Unless prodded | Not moving        |
| <b>Posture</b>     | Normal         | Back slanted                      | Hunched                 | Hunched Nosedown        |                   |
| <b>Diarrhea</b>    | Normal         | Soft stool<br>Discolored (Yellow) | Wet Stained tail/mucous | Liquid or no stool      |                   |

Clinical score: sum of all parameter scores, Normal = 0, Total possible score = 20, Found dead = 20
