# Supplementary material for: Microbiome-mediated neutrophil recruitment via CXCR2 and protection from amebic colitis
Source: PubMed Central journal article supplement (PMC5560520; doi:10.1371/journal.ppat.1006513), 2017-08-17
Supplement: ppat.1006513.s007.pdf [file ppat.1006513.s007.pdf]

**S2 Table. Conjugated Antibodies used for Flowcytometry**

| Fluorochrome         | Antibody      | Source        | Clone     |
|----------------------|---------------|---------------|-----------|
| Brilliant Violet 421 | CD11c         | Biolegend     | N418      |
| Brilliant Violet 605 | CD62L         | Biolegend     | MEL-14    |
| FITC                 | CXCR2         | Biolegend     | SA044G4   |
| PerCP-Cy5.5          | CXCR4         | Biolegend     | L276F12   |
| PE                   | SiglecF       | BD Pharmingen | E50-2440  |
| PE                   | CD54 (ICAM-1) | Biolegend     | YN1/1.7.4 |
| PE-Cy7               | Ly6G          | Biolegend     | 1A8       |
| APC                  | CD11b         | Biolegend     | M1/70     |
| APC                  | CD49d         | Biolegend     | R1-2      |
| AlexaFluor 700       | Ly6c          | Biolegend     | HK1.4     |
| AlexaFluor 700       | CD11b         | Biolegend     | M1/70     |
| APC-Cy7              | CD45          | Biolegend     | 30-F11    |
